# Supplementary material for: Urbanization changes the richness and homogenizes fungal and invertebrate communities in California
Source: Research Square preprint supplement (doi:10.21203/rs.3.rs-8663064/v1), 2026-02-24
Supplement: Supplementary file 1 [file 58053525fdfe860e11a72c0d.docx]

**Supplemental**

Table S1: Number of species occurrences by year, split by those assigned to a fungal or invertebrate phylum.

| Year | Fungal species occurrences | Invertebrate species occurrences |
| --- | --- | --- |
| 2000 | 5 | 102 |
| 2001 | 5 | 163 |
| 2002 | 18 | 178 |
| 2003 | 8 | 100 |
| 2004 | 27 | 417 |
| 2005 | 88 | 328 |
| 2006 | 24 | 388 |
| 2007 | 7 | 318 |
| 2008 | 10 | 201 |
| 2009 | 30 | 439 |
| 2010 | 27 | 701 |
| 2011 | 79 | 659 |
| 2012 | 116 | 452 |
| 2013 | 17 | 377 |
| 2014 | 182 | 243 |
| 2015 | 48 | 162 |
| 2016 | 52 | 459 |
| 2017 | 38 | 334 |
| 2018 | 249 | 312 |
| 2019 | 392 | 577 |
| 2020 | 260 | 134 |
| 2021 | 321 | 235 |
| 2022 | 359 | 3509 |
| 2023 | 5239 | 222 |
| 2024 | 4379 | 10 |

Table S2 - ANOVA on Chao-1 alpha diversity, split by orders, as linear models of area category (urban vs non-urban) and sampling year. Significant results (p < 0.05) marked in bold.

| Df | Deviance | Resid. Df | Resid. Dev | F | p | factor | order | community |
| --- | --- | --- | --- | --- | --- | --- | --- | --- |
| **1** | **208.85** | **6853** | **2589.71** | **26.76** | **0.00** | **year** | **Agaricales** | **Fungi** |
| **1** | **58.30** | **6852** | **2531.41** | **7.47** | **0.01** | **factor(Area):year** | **Agaricales** | **Fungi** |
| **1** | **43.33** | **6854** | **2798.57** | **5.55** | **0.02** | **factor(Area)** | **Agaricales** | **Fungi** |
| 1 | 4.20 | 662 | 200.69 | 2.79 | 0.10 | factor(Area) | Boletales | Fungi |
| 1 | 4.16 | 661 | 196.54 | 2.76 | 0.10 | year | Boletales | Fungi |
| 1 | 0.05 | 660 | 196.48 | 0.03 | 0.85 | factor(Area):year | Boletales | Fungi |
| 1 | 0.00 | 25 | 0.00 | NA | NA | factor(Area) | Botryosphaeriales | Fungi |
| 1 | 0.00 | 24 | 0.00 | NA | NA | year | Botryosphaeriales | Fungi |
| 1 | 0.00 | 23 | 0.00 | NA | NA | factor(Area):year | Botryosphaeriales | Fungi |
| **1** | **1.08** | **96** | **3.39** | **20.32** | **0.00** | **year** | **Cantharellales** | **Fungi** |
| 1 | 0.02 | 97 | 4.47 | 0.34 | 0.56 | factor(Area) | Cantharellales | Fungi |
| 1 | 0.01 | 95 | 3.38 | 0.26 | 0.61 | factor(Area):year | Cantharellales | Fungi |
| **1** | **1.28** | **42** | **8.37** | **5.10** | **0.03** | **factor(Area)** | **Capnodiales** | **Fungi** |
| 1 | 0.11 | 40 | 8.25 | 0.46 | 0.50 | factor(Area):year | Capnodiales | Fungi |
| 1 | 0.00 | 41 | 8.37 | 0.00 | 1.00 | year | Capnodiales | Fungi |
| 1 | 0.00 | 4 | 0.00 | NA | NA | factor(Area) | Chaetomellales | Fungi |
| 1 | 0.00 | 3 | 0.00 | NA | NA | year | Chaetomellales | Fungi |
| 1 | 0.00 | 2 | 0.00 | NA | NA | factor(Area):year | Chaetomellales | Fungi |
| **1** | **7.86** | **49** | **19.79** | **21.01** | **0.00** | **year** | **Chaetothyriales** | **Fungi** |
| **1** | **3.85** | **50** | **27.66** | **10.29** | **0.00** | **factor(Area)** | **Chaetothyriales** | **Fungi** |
| 1 | 0.17 | 48 | 19.62 | 0.46 | 0.50 | factor(Area):year | Chaetothyriales | Fungi |
| 1 | 0.00 | 28 | 0.00 | NA | NA | factor(Area) | Dacrymycetales | Fungi |
| 1 | 0.00 | 27 | 0.00 | NA | NA | year | Dacrymycetales | Fungi |
| 1 | 0.00 | 26 | 0.00 | NA | NA | factor(Area):year | Dacrymycetales | Fungi |
| **1** | **0.95** | **27** | **1.97** | **11.00** | **0.00** | **year** | **Dothideales** | **Fungi** |
| 1 | 0.28 | 28 | 2.92 | 3.21 | 0.08 | factor(Area) | Dothideales | Fungi |
| 1 | 0.02 | 26 | 1.95 | 0.21 | 0.65 | factor(Area):year | Dothideales | Fungi |
| **1** | **37.08** | **100** | **85.37** | **53.11** | **0.00** | **factor(Area)** | **Eurotiales** | **Fungi** |
| 1 | 0.65 | 98 | 84.26 | 0.92 | 0.34 | factor(Area):year | Eurotiales | Fungi |
| 1 | 0.47 | 99 | 84.91 | 0.67 | 0.42 | year | Eurotiales | Fungi |
| **1** | **0.19** | **64** | **0.40** | **26.06** | **0.00** | **year** | **Geastrales** | **Fungi** |
| 1 | 0.01 | 63 | 0.39 | 1.95 | 0.17 | factor(Area):year | Geastrales | Fungi |
| 1 | 0.00 | 65 | 0.60 | 0.19 | 0.66 | factor(Area) | Geastrales | Fungi |
| 1 | 0.00 | 28 | 0.00 | NA | NA | factor(Area) | Gloeophyllales | Fungi |
| 1 | 0.00 | 27 | 0.00 | NA | NA | year | Gloeophyllales | Fungi |
| 1 | 0.00 | 26 | 0.00 | NA | NA | factor(Area):year | Gloeophyllales | Fungi |
| **1** | **0.73** | **132** | **1.62** | **41.36** | **0.00** | **year** | **Gomphales** | **Fungi** |
| 1 | 0.01 | 133 | 2.35 | 0.29 | 0.59 | factor(Area) | Gomphales | Fungi |
| 1 | 0.00 | 131 | 1.62 | 0.13 | 0.72 | factor(Area):year | Gomphales | Fungi |
| **1** | **42.69** | **309** | **289.44** | **12.81** | **0.00** | **year** | **Helotiales** | **Fungi** |
| **1** | **20.92** | **310** | **332.13** | **6.28** | **0.01** | **factor(Area)** | **Helotiales** | **Fungi** |
| 1 | 6.95 | 308 | 282.49 | 2.08 | 0.15 | factor(Area):year | Helotiales | Fungi |
| **1** | **54.76** | **307** | **60.77** | **111.10** | **0.00** | **year** | **Hymenochaetales** | **Fungi** |
| **1** | **3.05** | **308** | **115.53** | **6.18** | **0.01** | **factor(Area)** | **Hymenochaetales** | **Fungi** |
| 1 | 0.46 | 306 | 60.31 | 0.93 | 0.34 | factor(Area):year | Hymenochaetales | Fungi |
| **1** | **22.65** | **315** | **161.57** | **15.89** | **0.00** | **year** | **Hypocreales** | **Fungi** |
| **1** | **10.25** | **316** | **184.22** | **7.20** | **0.01** | **factor(Area)** | **Hypocreales** | **Fungi** |
| 1 | 4.22 | 314 | 157.36 | 2.96 | 0.09 | factor(Area):year | Hypocreales | Fungi |
| **1** | **2.74** | **53** | **23.85** | **5.30** | **0.03** | **year** | **Mortierellales** | **Fungi** |
| 1 | 1.33 | 54 | 26.59 | 2.58 | 0.11 | factor(Area) | Mortierellales | Fungi |
| 1 | 0.02 | 52 | 23.83 | 0.04 | 0.85 | factor(Area):year | Mortierellales | Fungi |
| **1** | **1.31** | **16** | **2.45** | **7.70** | **0.01** | **year** | **Mucorales** | **Fungi** |
| 1 | 0.74 | 17 | 3.76 | 4.36 | 0.05 | factor(Area) | Mucorales | Fungi |
| 1 | 0.02 | 15 | 2.43 | 0.14 | 0.71 | factor(Area):year | Mucorales | Fungi |
| **1** | **2.60** | **36** | **2.21** | **23.16** | **0.00** | **year** | **Orbiliales** | **Fungi** |
| 1 | 0.08 | 37 | 4.82 | 0.74 | 0.40 | factor(Area) | Orbiliales | Fungi |
| 1 | 0.01 | 35 | 2.21 | 0.05 | 0.83 | factor(Area):year | Orbiliales | Fungi |
| **1** | **23.10** | **677** | **298.12** | **13.57** | **0.00** | **year** | **Pezizales** | **Fungi** |
| 1 | 6.22 | 678 | 321.21 | 3.65 | 0.06 | factor(Area) | Pezizales | Fungi |
| 1 | 5.09 | 676 | 293.02 | 2.99 | 0.08 | factor(Area):year | Pezizales | Fungi |
| **1** | **13.96** | **59** | **24.75** | **32.68** | **0.00** | **year** | **Pleosporales** | **Fungi** |
| **1** | **9.90** | **60** | **38.71** | **23.17** | **0.00** | **factor(Area)** | **Pleosporales** | **Fungi** |
| 1 | 0.24 | 58 | 24.51 | 0.57 | 0.45 | factor(Area):year | Pleosporales | Fungi |
| **1** | **198.20** | **786** | **185.96** | **223.96** | **0.00** | **year** | **Polyporales** | **Fungi** |
| **1** | **16.44** | **785** | **169.52** | **18.57** | **0.00** | **factor(Area):year** | **Polyporales** | **Fungi** |
| **1** | **7.72** | **787** | **384.16** | **8.72** | **0.00** | **factor(Area)** | **Polyporales** | **Fungi** |
| 1 | 0.00 | 63 | 0.00 | NA | NA | factor(Area) | Pucciniales | Fungi |
| 1 | 0.00 | 62 | 0.00 | NA | NA | year | Pucciniales | Fungi |
| 1 | 0.00 | 61 | 0.00 | NA | NA | factor(Area):year | Pucciniales | Fungi |
| **1** | **24.35** | **800** | **176.12** | **37.45** | **0.00** | **year** | **Russulales** | **Fungi** |
| **1** | **3.58** | **801** | **200.47** | **5.51** | **0.02** | **factor(Area)** | **Russulales** | **Fungi** |
| **1** | **2.83** | **799** | **173.29** | **4.35** | **0.04** | **factor(Area):year** | **Russulales** | **Fungi** |
| 1 | 0.12 | 13 | 2.58 | 0.34 | 0.57 | factor(Area) | Sporidiobolales | Fungi |
| 1 | 0.07 | 12 | 2.51 | 0.22 | 0.65 | year | Sporidiobolales | Fungi |
| 1 | 0.00 | 11 | 2.51 | 0.00 | 0.97 | factor(Area):year | Sporidiobolales | Fungi |
| **1** | **5.41** | **112** | **55.45** | **6.16** | **0.01** | **year** | **Thelephorales** | **Fungi** |
| **1** | **3.81** | **113** | **60.86** | **4.34** | **0.04** | **factor(Area)** | **Thelephorales** | **Fungi** |
| 1 | 0.02 | 111 | 55.43 | 0.02 | 0.88 | factor(Area):year | Thelephorales | Fungi |
| 1 | 0.01 | 52 | 1.72 | 0.08 | 0.78 | factor(Area) | Xylariales | Fungi |
| 1 | 0.00 | 51 | 1.72 | 0.01 | 0.92 | year | Xylariales | Fungi |
| 1 | 0.00 | 50 | 1.72 | 0.00 | 0.98 | factor(Area):year | Xylariales | Fungi |
| **1** | **17.70** | **62** | **17.98** | **58.59** | **0.00** | **year** | **Amphipoda** | **Invertebrates** |
| **1** | **7.34** | **63** | **35.68** | **24.30** | **0.00** | **factor(Area)** | **Amphipoda** | **Invertebrates** |
| 1 | 0.54 | 61 | 17.44 | 1.78 | 0.19 | factor(Area):year | Amphipoda | Invertebrates |
| 1 | 1.17 | 94 | 15.72 | 3.19 | 0.08 | year | Anostraca | Invertebrates |
| 1 | 0.44 | 95 | 16.89 | 1.21 | 0.27 | factor(Area) | Anostraca | Invertebrates |
| 1 | 0.21 | 93 | 15.51 | 0.58 | 0.45 | factor(Area):year | Anostraca | Invertebrates |
| **1** | **32.26** | **497** | **690.96** | **5.64** | **0.02** | **factor(Area)** | **Araneae** | **Invertebrates** |
| 1 | 15.24 | 495 | 670.75 | 2.66 | 0.10 | factor(Area):year | Araneae | Invertebrates |
| 1 | 4.97 | 496 | 685.99 | 0.87 | 0.35 | year | Araneae | Invertebrates |
| 1 | 0.14 | 105 | 6.22 | 1.47 | 0.23 | year | Blattodea | Invertebrates |
| 1 | 0.05 | 106 | 6.36 | 0.54 | 0.47 | factor(Area) | Blattodea | Invertebrates |
| 1 | 0.00 | 104 | 6.22 | 0.03 | 0.86 | factor(Area):year | Blattodea | Invertebrates |
| 1 | 0.09 | 17 | 2.22 | 0.46 | 0.51 | factor(Area):year | Calanoida | Invertebrates |
| 1 | 0.03 | 19 | 2.32 | 0.17 | 0.69 | factor(Area) | Calanoida | Invertebrates |
| 1 | 0.01 | 18 | 2.31 | 0.06 | 0.80 | year | Calanoida | Invertebrates |
| 1 | 0.27 | 60 | 5.11 | 2.04 | 0.16 | factor(Area):year | Cheilostomatida | Invertebrates |
| 1 | 0.10 | 62 | 5.42 | 0.74 | 0.39 | factor(Area) | Cheilostomatida | Invertebrates |
| 1 | 0.04 | 61 | 5.38 | 0.27 | 0.61 | year | Cheilostomatida | Invertebrates |
| 1 | 1.03 | 41 | 14.94 | 2.44 | 0.13 | factor(Area):year | Chitonida | Invertebrates |
| 1 | 0.87 | 42 | 15.96 | 2.06 | 0.16 | year | Chitonida | Invertebrates |
| 1 | 0.00 | 43 | 16.83 | 0.01 | 0.94 | factor(Area) | Chitonida | Invertebrates |
| **1** | **342.83** | **1904** | **1975.38** | **127.83** | **0.00** | **year** | **Coleoptera** | **Invertebrates** |
| 1 | 6.81 | 1905 | 2318.21 | 2.54 | 0.11 | factor(Area) | Coleoptera | Invertebrates |
| 1 | 0.11 | 1903 | 1975.28 | 0.04 | 0.84 | factor(Area):year | Coleoptera | Invertebrates |
| 1 | 0.32 | 23 | 2.95 | 1.64 | 0.21 | year | Crassiclitellata | Invertebrates |
| 1 | 0.10 | 24 | 3.27 | 0.50 | 0.49 | factor(Area) | Crassiclitellata | Invertebrates |
| 1 | 0.04 | 22 | 2.91 | 0.22 | 0.64 | factor(Area):year | Crassiclitellata | Invertebrates |
| **1** | **7.32** | **71** | **50.50** | **7.88** | **0.01** | **factor(Area)** | **Decapoda** | **Invertebrates** |
| 1 | 1.71 | 69 | 47.30 | 1.84 | 0.18 | factor(Area):year | Decapoda | Invertebrates |
| 1 | 1.50 | 70 | 49.01 | 1.61 | 0.21 | year | Decapoda | Invertebrates |
| 1 | 0.02 | 54 | 1.71 | 0.25 | 0.62 | year | Dermaptera | Invertebrates |
| 1 | 0.01 | 55 | 1.72 | 0.16 | 0.69 | factor(Area) | Dermaptera | Invertebrates |
| 1 | 0.01 | 53 | 1.70 | 0.12 | 0.73 | factor(Area):year | Dermaptera | Invertebrates |
| 1 | 0.11 | 18 | 1.88 | 0.65 | 0.43 | year | Diplostraca | Invertebrates |
| 1 | 0.06 | 17 | 1.83 | 0.33 | 0.57 | factor(Area):year | Diplostraca | Invertebrates |
| 1 | 0.03 | 19 | 2.00 | 0.15 | 0.70 | factor(Area) | Diplostraca | Invertebrates |
| **1** | **1148.06** | **2125** | **3642.25** | **553.43** | **0.00** | **year** | **Diptera** | **Invertebrates** |
| **1** | **74.88** | **2126** | **4790.31** | **36.10** | **0.00** | **factor(Area)** | **Diptera** | **Invertebrates** |
| 1 | 1.06 | 2124 | 3641.18 | 0.51 | 0.47 | factor(Area):year | Diptera | Invertebrates |
| 1 | 0.05 | 42 | 1.67 | 0.59 | 0.45 | factor(Area) | Embioptera | Invertebrates |
| 1 | 0.01 | 41 | 1.66 | 0.14 | 0.71 | year | Embioptera | Invertebrates |
| 1 | 0.01 | 40 | 1.65 | 0.11 | 0.74 | factor(Area):year | Embioptera | Invertebrates |
| **1** | **3.99** | **372** | **47.00** | **22.03** | **0.00** | **factor(Area):year** | **Entomobryomorpha** | **Invertebrates** |
| **1** | **3.42** | **374** | **52.68** | **18.90** | **0.00** | **factor(Area)** | **Entomobryomorpha** | **Invertebrates** |
| **1** | **1.69** | **373** | **50.98** | **9.35** | **0.00** | **year** | **Entomobryomorpha** | **Invertebrates** |
| 1 | 1.63 | 83 | 36.47 | 2.19 | 0.14 | factor(Area) | Ephemeroptera | Invertebrates |
| 1 | 0.97 | 82 | 35.50 | 1.31 | 0.26 | year | Ephemeroptera | Invertebrates |
| 1 | 0.08 | 81 | 35.43 | 0.10 | 0.75 | factor(Area):year | Ephemeroptera | Invertebrates |
| 1 | 0.31 | 9 | 0.59 | 4.89 | 0.06 | factor(Area) | Eunicida | Invertebrates |
| 1 | 0.08 | 8 | 0.51 | 1.31 | 0.29 | year | Eunicida | Invertebrates |
| 1 | 0.04 | 7 | 0.47 | 0.60 | 0.46 | factor(Area):year | Eunicida | Invertebrates |
| 1 | 0.00 | 5 | 0.00 | NA | NA | factor(Area) | Gordioidea | Invertebrates |
| 1 | 0.00 | 4 | 0.00 | NA | NA | year | Gordioidea | Invertebrates |
| 1 | 0.00 | 3 | 0.00 | NA | NA | factor(Area):year | Gordioidea | Invertebrates |
| 1 | 0.00 | 27 | 0.00 | NA | NA | factor(Area) | Harpacticoida | Invertebrates |
| 1 | 0.00 | 26 | 0.00 | NA | NA | year | Harpacticoida | Invertebrates |
| 1 | 0.00 | 25 | 0.00 | NA | NA | factor(Area):year | Harpacticoida | Invertebrates |
| **1** | **401.49** | **1465** | **1552.97** | **326.27** | **0.00** | **year** | **Hemiptera** | **Invertebrates** |
| **1** | **19.48** | **1466** | **1954.46** | **15.83** | **0.00** | **factor(Area)** | **Hemiptera** | **Invertebrates** |
| 1 | 0.00 | 1464 | 1552.97 | 0.00 | 0.96 | factor(Area):year | Hemiptera | Invertebrates |
| **1** | **715.17** | **2012** | **2494.07** | **200.80** | **0.00** | **year** | **Hymenoptera** | **Invertebrates** |
| **1** | **237.71** | **2013** | **3209.24** | **66.74** | **0.00** | **factor(Area)** | **Hymenoptera** | **Invertebrates** |
| 1 | 0.52 | 2011 | 2493.55 | 0.15 | 0.70 | factor(Area):year | Hymenoptera | Invertebrates |
| **1** | **1.56** | **95** | **15.48** | **6.11** | **0.02** | **year** | **Isopoda** | **Invertebrates** |
| 1 | 0.94 | 96 | 17.04 | 3.69 | 0.06 | factor(Area) | Isopoda | Invertebrates |
| 1 | 0.08 | 94 | 15.40 | 0.30 | 0.58 | factor(Area):year | Isopoda | Invertebrates |
| **1** | **1114.52** | **3282** | **4412.29** | **323.00** | **0.00** | **year** | **Lepidoptera** | **Invertebrates** |
| **1** | **85.87** | **3283** | **5526.81** | **24.89** | **0.00** | **factor(Area)** | **Lepidoptera** | **Invertebrates** |
| 1 | 1.16 | 3281 | 4411.13 | 0.34 | 0.56 | factor(Area):year | Lepidoptera | Invertebrates |
| **1** | **5.21** | **69** | **15.28** | **17.55** | **0.00** | **year** | **Littorinimorpha** | **Invertebrates** |
| 1 | 0.33 | 68 | 14.95 | 1.10 | 0.30 | factor(Area):year | Littorinimorpha | Invertebrates |
| 1 | 0.17 | 70 | 20.49 | 0.56 | 0.46 | factor(Area) | Littorinimorpha | Invertebrates |
| **1** | **0.38** | **9** | **0.12** | **60347859146267800000000000.00** | **0.00** | **year** | **Mantodea** | **Invertebrates** |
| **1** | **0.12** | **8** | **0.00** | **19797676616403200000000000.00** | **0.00** | **factor(Area):year** | **Mantodea** | **Invertebrates** |
| **1** | **0.04** | **10** | **0.50** | **5870782397786410000000000.00** | **0.00** | **factor(Area)** | **Mantodea** | **Invertebrates** |
| 1 | 0.16 | 88 | 6.31 | 1.56 | 0.22 | factor(Area) | Mesostigmata | Invertebrates |
| 1 | 0.06 | 86 | 6.24 | 0.60 | 0.44 | factor(Area):year | Mesostigmata | Invertebrates |
| 1 | 0.00 | 87 | 6.30 | 0.02 | 0.88 | year | Mesostigmata | Invertebrates |
| **1** | **1.74** | **22** | **3.17** | **11.24** | **0.00** | **year** | **Mytilida** | **Invertebrates** |
| 1 | 0.28 | 23 | 4.91 | 1.84 | 0.19 | factor(Area) | Mytilida | Invertebrates |
| 1 | 0.01 | 21 | 3.17 | 0.04 | 0.84 | factor(Area):year | Mytilida | Invertebrates |
| **1** | **1.53** | **55** | **14.82** | **4.03** | **0.05** | **factor(Area)** | **Neogastropoda** | **Invertebrates** |
| 1 | 0.77 | 54 | 14.05 | 2.03 | 0.16 | year | Neogastropoda | Invertebrates |
| 1 | 0.01 | 53 | 14.03 | 0.03 | 0.86 | factor(Area):year | Neogastropoda | Invertebrates |
| 1 | 2.30 | 524 | 192.34 | 3.79 | 0.05 | year | Neuroptera | Invertebrates |
| 1 | 1.40 | 525 | 194.64 | 2.31 | 0.13 | factor(Area) | Neuroptera | Invertebrates |
| 1 | 0.00 | 523 | 192.34 | 0.00 | 0.97 | factor(Area):year | Neuroptera | Invertebrates |
| 1 | 2.33 | 43 | 21.41 | 2.43 | 0.13 | year | Nudibranchia | Invertebrates |
| 1 | 0.19 | 42 | 21.23 | 0.19 | 0.66 | factor(Area):year | Nudibranchia | Invertebrates |
| 1 | 0.04 | 44 | 23.74 | 0.04 | 0.84 | factor(Area) | Nudibranchia | Invertebrates |
| 1 | 2.39 | 61 | 20.71 | 3.21 | 0.08 | factor(Area) | Odonata | Invertebrates |
| 1 | 0.84 | 60 | 19.87 | 1.12 | 0.29 | year | Odonata | Invertebrates |
| 1 | 0.03 | 59 | 19.84 | 0.04 | 0.85 | factor(Area):year | Odonata | Invertebrates |
| **1** | **6.43** | **241** | **78.97** | **10.90** | **0.00** | **year** | **Orthoptera** | **Invertebrates** |
| 1 | 0.80 | 242 | 85.39 | 1.35 | 0.25 | factor(Area) | Orthoptera | Invertebrates |
| 1 | 0.09 | 240 | 78.87 | 0.16 | 0.69 | factor(Area):year | Orthoptera | Invertebrates |
| 1 | 0.26 | 23 | 1.15 | 4.28 | 0.05 | year | Pedunculata | Invertebrates |
| 1 | 0.11 | 24 | 1.41 | 1.76 | 0.20 | factor(Area) | Pedunculata | Invertebrates |
| 1 | 0.01 | 22 | 1.15 | 0.08 | 0.78 | factor(Area):year | Pedunculata | Invertebrates |
| **1** | **8.06** | **44** | **29.00** | **10.91** | **0.00** | **year** | **Phyllodocida** | **Invertebrates** |
| 1 | 0.07 | 45 | 37.07 | 0.09 | 0.76 | factor(Area) | Phyllodocida | Invertebrates |
| 1 | 0.04 | 43 | 28.96 | 0.06 | 0.81 | factor(Area):year | Phyllodocida | Invertebrates |
| 1 | 2.05 | 145 | 59.88 | 1.64 | 0.20 | year | Plecoptera | Invertebrates |
| 1 | 0.51 | 146 | 61.93 | 0.41 | 0.52 | factor(Area) | Plecoptera | Invertebrates |
| 1 | 0.02 | 144 | 59.86 | 0.02 | 0.89 | factor(Area):year | Plecoptera | Invertebrates |
| 1 | 0.83 | 15 | 3.02 | 3.80 | 0.07 | factor(Area):year | Podocopida | Invertebrates |
| 1 | 0.64 | 16 | 3.85 | 2.94 | 0.11 | year | Podocopida | Invertebrates |
| 1 | 0.59 | 17 | 4.49 | 2.69 | 0.12 | factor(Area) | Podocopida | Invertebrates |
| 1 | 1.67 | 453 | 261.04 | 1.94 | 0.16 | year | Psocodea | Invertebrates |
| 1 | 1.56 | 454 | 262.71 | 1.81 | 0.18 | factor(Area) | Psocodea | Invertebrates |
| 1 | 0.21 | 452 | 260.83 | 0.24 | 0.62 | factor(Area):year | Psocodea | Invertebrates |
| **1** | **1.69** | **28** | **7.21** | **5.41** | **0.03** | **factor(Area):year** | **Sabellida** | **Invertebrates** |
| 1 | 1.06 | 29 | 8.90 | 3.39 | 0.08 | year | Sabellida | Invertebrates |
| 1 | 0.03 | 30 | 9.96 | 0.10 | 0.76 | factor(Area) | Sabellida | Invertebrates |
| **1** | **1.70** | **60** | **16.37** | **4.53** | **0.04** | **year** | **Sessilia** | **Invertebrates** |
| 1 | 0.89 | 61 | 18.07 | 2.39 | 0.13 | factor(Area) | Sessilia | Invertebrates |
| 1 | 0.03 | 59 | 16.35 | 0.07 | 0.79 | factor(Area):year | Sessilia | Invertebrates |
| 1 | 0.67 | 24 | 8.61 | 1.10 | 0.31 | factor(Area):year | Solifugae | Invertebrates |
| 1 | 0.17 | 26 | 9.29 | 0.27 | 0.61 | factor(Area) | Solifugae | Invertebrates |
| 1 | 0.00 | 25 | 9.28 | 0.00 | 0.94 | year | Solifugae | Invertebrates |
| **1** | **2.47** | **28** | **2.65** | **25.24** | **0.00** | **factor(Area)** | **Stylommatophora** | **Invertebrates** |
| 1 | 0.13 | 26 | 2.51 | 1.32 | 0.26 | factor(Area):year | Stylommatophora | Invertebrates |
| 1 | 0.01 | 27 | 2.64 | 0.09 | 0.77 | year | Stylommatophora | Invertebrates |
| 1 | 0.00 | 10 | 0.00 | NA | NA | factor(Area) | Symphypleona | Invertebrates |
| 1 | 0.00 | 9 | 0.00 | NA | NA | year | Symphypleona | Invertebrates |
| 1 | 0.00 | 8 | 0.00 | NA | NA | factor(Area):year | Symphypleona | Invertebrates |
| **1** | **2.03** | **482** | **158.44** | **4.23** | **0.04** | **factor(Area)** | **Thysanoptera** | **Invertebrates** |
| 1 | 0.11 | 480 | 158.25 | 0.23 | 0.63 | factor(Area):year | Thysanoptera | Invertebrates |
| 1 | 0.08 | 481 | 158.36 | 0.16 | 0.69 | year | Thysanoptera | Invertebrates |
| **1** | **15.52** | **333** | **230.38** | **12.74** | **0.00** | **year** | **Trichoptera** | **Invertebrates** |
| 1 | 1.55 | 332 | 228.83 | 1.27 | 0.26 | factor(Area):year | Trichoptera | Invertebrates |
| 1 | 0.18 | 334 | 245.90 | 0.15 | 0.70 | factor(Area) | Trichoptera | Invertebrates |
| **1** | **2.70** | **33** | **12.58** | **5.21** | **0.03** | **factor(Area)** | **Trochida** | **Invertebrates** |
| 1 | 1.14 | 31 | 11.17 | 2.19 | 0.15 | factor(Area):year | Trochida | Invertebrates |
| 1 | 0.28 | 32 | 12.30 | 0.53 | 0.47 | year | Trochida | Invertebrates |
| 1 | 0.79 | 91 | 24.72 | 2.02 | 0.16 | year | Trombidiformes | Invertebrates |
| 1 | 0.01 | 92 | 25.50 | 0.02 | 0.88 | factor(Area) | Trombidiformes | Invertebrates |
| 1 | 0.00 | 90 | 24.71 | 0.01 | 0.92 | factor(Area):year | Trombidiformes | Invertebrates |
| 1 | 0.00 | 4 | 0.00 | NA | NA | factor(Area) | Zygentoma | Invertebrates |
| 1 | 0.00 | 3 | 0.00 | NA | NA | year | Zygentoma | Invertebrates |
| 1 | 0.00 | 2 | 0.00 | NA | NA | factor(Area):year | Zygentoma | Invertebrates |

Table S3 - Difference in mean distance to median Chao beta diversity for non-urban versus urban samples for fungal and invertebrate orders. Note: Only results with adjusted significance values of less than 0.05 are included.

| Community | Difference in mean distance to median beta diversity (Urban - Non-urban) | order | Number Non-Urban Samples | Number Urban Samples |
| --- | --- | --- | --- | --- |
| Fungi | -6.98 x 10-4 | Agaricales | 6067 | 789 |
| Fungi | -1.95 x 10-2 | Pezizales | 631 | 49 |
| Fungi | -1.67 x 10-2 | Russulales | 726 | 77 |
| Fungi | -0.71 | Amphisphaeriales | 4 | 3 |
| Fungi | -0.25 | Thelephorales | 105 | 10 |
| Fungi | -0.62 | Gloeophyllales | 28 | 2 |
| Fungi | -5.93 x 10-2 | Cantharellales | 94 | 5 |
| Fungi | -0.25 | Rhytismatales | 54 | 3 |
| Fungi | -1.31 x 10-2 | Hymenochaetales | 269 | 41 |
| Fungi | -3.77 x 10-3 | Boletales | 591 | 73 |
| Fungi | -4.64 x 10-3 | Polyporales | 702 | 87 |
| Fungi | -2.50 x 10-2 | Gomphales | 125 | 10 |
| Invertebrates | -5.60 x 10-3 | Lepidoptera | 2704 | 581 |
| Invertebrates | -0.22 | Psocodea | 266 | 190 |
| Invertebrates | -0.71 | Symphypleona | 2 | 10 |
| Invertebrates | -8.51 x 10-3 | Coleoptera | 1703 | 204 |
| Invertebrates | -2.36 x 10-2 | Hymenoptera | 1506 | 509 |
| Invertebrates | -1.18 x 10-2 | Hemiptera | 1167 | 301 |
| Invertebrates | -9.70 x 10-3 | Diptera | 1734 | 394 |
| Invertebrates | 0.26 | Phyllodocida | 28 | 19 |
| Invertebrates | -1.74 x 10-2 | Araneae | 281 | 218 |
| Invertebrates | -0.29 | Ephemeroptera | 79 | 6 |
| Invertebrates | -0.41 | Mesostigmata | 17 | 73 |
| Invertebrates | 0.39 | Trochida | 25 | 10 |
| Invertebrates | 0.19 | Decapoda | 28 | 45 |
| Invertebrates | -2.76 x 10-2 | Neuroptera | 458 | 69 |
| Invertebrates | -5.90 x 10-2 | Orthoptera | 219 | 25 |
| Invertebrates | 0.15 | Amphipoda | 40 | 25 |
| Invertebrates | 0.22 | Neogastropoda | 27 | 30 |
| Invertebrates | 8.58 x 10-2 | Diplostraca | 10 | 11 |

Table S4 - Pairwise comparisons of LCBD values for non-urban versus urban samples for various fungal and invertebrate orders (Only significant results, p < 0.05). Negative EMM values indicate a greater LCBD for urban samples.

| Community | Estimated marginal mean (EMM) | Standard error (SE) | Degrees of freedom | t ratio | order |
| --- | --- | --- | --- | --- | --- |
| Fungi | 0.88 | 2.07 x 10-16 | 5 | 4.23 x 1016 | Amphisphaeriales |
| Fungi | -1.39 | 8.89 x 10-16 | 1 | -1.56 x 1015 | Cephalothecales |
| Fungi | -4.23 x10-2 | 9.20 x 10-3 | 310 | -4.60 | Helotiales |
| Fungi | -0.21 | 4.26 x 10-2 | 28 | -4.93 | Dothideales |
| Fungi | -0.27 | 6.92 x 10-2 | 100 | -3.91 | Eurotiales |
| Fungi | -4.39 x 10-4 | 1.35 x 10-4 | 6854 | -3.25 | Agaricales |
| Fungi | -6.83 x 10-2 | 2.09 x 10-2 | 63 | -3.27 | Pucciniales |
| Fungi | -7.90 x 10-2 | 3.08 x 10-2 | 60 | -2.57 | Pleosporales |
| Fungi | -8.30 x 10-3 | 3.49 x 10-3 | 662 | -2.38 | Boletales |
| Fungi | -1.84 x 10-2 | 7.99 x 10-3 | 316 | -2.30 | Hypocreales |
| Fungi | 0.58 | 0.26 | 28 | 2.22 | Gloeophyllales |
| Fungi | -0.55 | 0.26 | 54 | -2.12 | Mortierellales |
| Invertebrates | 0.25 | 1.67 x 10-2 | 454 | 14.81 | Psocodea |
| Invertebrates | 2.25 x 10-2 | 1.80 x 10-3 | 2013 | 12.47 | Hymenoptera |
| Invertebrates | 2.20 | 1.21 x 10-16 | 2 | 1.82 x 1017 | Polydesmida |
| Invertebrates | 2.20 | 8.56 x 10-16 | 2 | 2.57 x 1016 | Sarcoptiformes |
| Invertebrates | 2.28 x 10-2 | 3.71 x 10-3 | 497 | 6.16 | Araneae |
| Invertebrates | 0.18 | 3.13 x 10-2 | 374 | 5.83 | Entomobryomorpha |
| Invertebrates | 2.11 x 10-3 | 3.99 x 10-4 | 3283 | 5.29 | Lepidoptera |
| Invertebrates | 4.11 | 0.34 | 10 | 12.06 | Symphypleona |
| Invertebrates | -0.49 | 8.96 x 10-2 | 45 | -5.43 | Phyllodocida |
| Invertebrates | -0.27 | 5.29 x 10-2 | 63 | -5.19 | Amphipoda |
| Invertebrates | 2.33 | 0.45 | 42 | 5.13 | Embioptera |
| Invertebrates | -0.25 | 5.06 x 10-2 | 55 | -4.96 | Neogastropoda |
| Invertebrates | 0.79 | 0.17 | 92 | 4.73 | Trombidiformes |
| Invertebrates | -0.26 | 5.43 x 10-2 | 61 | -4.73 | Sessilia |
| Invertebrates | 1.08 | 0.26 | 88 | 4.19 | Mesostigmata |
| Invertebrates | -1.20 | 0.28 | 33 | -4.31 | Trochida |
| Invertebrates | -0.14 | 3.85 x 10-2 | 71 | -3.66 | Decapoda |
| Invertebrates | -9.76 x 10-3 | 3.02 x 10-3 | 2126 | -3.24 | Diptera |
| Invertebrates | -0.20 | 5.87 x 10-2 | 19 | -3.48 | Diplostraca |
| Invertebrates | -8.83 x10-15 | 2.81 x 10-15 | 26 | -3.15 | Solifugae |
| Invertebrates | -0.33 | 0.11 | 43 | -2.99 | Chitonida |
| Invertebrates | -5.14 x 10-3 | 1.82 x 10-3 | 1905 | -2.82 | Coleoptera |
| Invertebrates | -0.11 | 4.08 x 10-2 | 24 | -2.65 | Pedunculata |
| Invertebrates | -0.13 | 5.50 x 10-2 | 106 | -2.31 | Blattodea |
| Invertebrates | 1.10 | 0.33 | 4 | 3.30 | Zygentoma |
| Invertebrates | -0.43 | 0.20 | 24 | -2.10 | Crassiclitellata |
| Invertebrates | -4.66 x 10-2 | 2.29 x 10-2 | 44 | -2.04 | Nudibranchia |

Table S5 - PERMANOVA (999 permutations) on Chao beta diversity for fungal and invertebrate orders. Significant results (p < 0.05) marked in bold.

| Df | SumOfSqs | R2 | F | p | Factor | order | community |
| --- | --- | --- | --- | --- | --- | --- | --- |
| **1** | **1.58** | **4.6 x 10-4** | **3.18** | **10-3** | **Area** | **Agaricales** | **Fungi** |
| **1** | **1.09** | **3.19 x 10-4** | **2.19** | **10-3** | **year** | **Agaricales** | **Fungi** |
| **1** | **0.77** | **2.24 x 10-4** | **1.54** | **10-3** | **Area:year** | **Agaricales** | **Fungi** |
| **1** | **1.07** | **0.42** | **4.29** | **0.03** | **Area** | **Amphisphaeriales** | **Fungi** |
| **1** | **0.50** | **0.19** | **2.00** | **0.03** | **year** | **Amphisphaeriales** | **Fungi** |
| **1** | **1.28** | **0.00** | **2.63** | **10-3** | **Area** | **Boletales** | **Fungi** |
| **1** | **1.86** | **0.01** | **3.81** | **10-3** | **year** | **Boletales** | **Fungi** |
| **1** | **0.94** | **0.00** | **1.93** | **10-3** | **Area:year** | **Boletales** | **Fungi** |
| **1** | **0.73** | **0.09** | **2.82** | **0.01** | **Area:year** | **Botryosphaeriales** | **Fungi** |
| **1** | **1.28** | **0.16** | **4.94** | **0.01** | **Area** | **Botryosphaeriales** | **Fungi** |
| 1 | 0.27 | 0.03 | 1.04 | 0.34 | year | Botryosphaeriales | Fungi |
| **1** | **1.57** | **0.03** | **3.47** | **10-3** | **year** | **Cantharellales** | **Fungi** |
| **1** | **0.86** | **0.02** | **1.91** | **0.01** | **Area:year** | **Cantharellales** | **Fungi** |
| **1** | **0.96** | **0.02** | **2.13** | **0.01** | **Area** | **Cantharellales** | **Fungi** |
| **1** | **2.31** | **0.12** | **6.47** | **10-3** | **Area** | **Capnodiales** | **Fungi** |
| **1** | **1.83** | **0.10** | **5.13** | **10-3** | **year** | **Capnodiales** | **Fungi** |
| 1 | 0.40 | 0.02 | 1.12 | 0.36 | Area:year | Capnodiales | Fungi |
| 1 | 0.79 | 0.40 | 3.16 | 0.10 | year | Chaetomellales | Fungi |
| 1 | 0.46 | 0.23 | 1.84 | 0.40 | Area:year | Chaetomellales | Fungi |
| 1 | 0.25 | 0.13 | 1.00 | 0.60 | Area | Chaetomellales | Fungi |
| **1** | **1.18** | **0.06** | **4.09** | **10-3** | **Area** | **Chaetothyriales** | **Fungi** |
| **1** | **3.65** | **0.19** | **12.62** | **10-3** | **year** | **Chaetothyriales** | **Fungi** |
| **1** | **0.73** | **0.04** | **2.51** | **10-3** | **Area:year** | **Chaetothyriales** | **Fungi** |
| **1** | **1.00** | **0.08** | **2.49** | **0.03** | **year** | **Dacrymycetales** | **Fungi** |
| 1 | 0.52 | 0.04 | 1.29 | 0.25 | Area:year | Dacrymycetales | Fungi |
| 1 | 0.13 | 0.01 | 0.33 | 0.86 | Area | Dacrymycetales | Fungi |
| **1** | **1.13** | **0.09** | **3.22** | **10-3** | **Area** | **Dothideales** | **Fungi** |
| **1** | **2.03** | **0.16** | **5.79** | **10-3** | **year** | **Dothideales** | **Fungi** |
| **1** | **0.54** | **0.04** | **1.55** | **0.03** | **Area:year** | **Dothideales** | **Fungi** |
| **1** | **2.56** | **0.06** | **6.37** | **10-3** | **Area** | **Eurotiales** | **Fungi** |
| **1** | **2.02** | **0.05** | **5.03** | **10-3** | **year** | **Eurotiales** | **Fungi** |
| **1** | **0.73** | **0.02** | **1.82** | **0.03** | **Area:year** | **Eurotiales** | **Fungi** |
| 1 | 0.72 | 0.02 | 1.64 | 0.08 | year | Geastrales | Fungi |
| 1 | 0.51 | 0.02 | 1.17 | 0.34 | Area:year | Geastrales | Fungi |
| 1 | 0.36 | 0.01 | 0.82 | 0.60 | Area | Geastrales | Fungi |
| 1 | 0.47 | 0.04 | 1.18 | 0.34 | Area | Gloeophyllales | Fungi |
| 1 | 0.46 | 0.04 | 1.14 | 0.38 | year | Gloeophyllales | Fungi |
| 1 | 0.08 | 0.01 | 0.19 | 0.84 | Area:year | Gloeophyllales | Fungi |
| **1** | **0.77** | **0.01** | **1.62** | **0.02** | **Area** | **Gomphales** | **Fungi** |
| **1** | **0.71** | **0.01** | **1.49** | **0.03** | **year** | **Gomphales** | **Fungi** |
| **1** | **0.72** | **0.01** | **1.51** | **0.03** | **Area:year** | **Gomphales** | **Fungi** |
| **1** | **1.11** | **0.01** | **2.32** | **10-3** | **Area** | **Helotiales** | **Fungi** |
| **1** | **1.95** | **0.01** | **4.09** | **10-3** | **year** | **Helotiales** | **Fungi** |
| **1** | **1.04** | **0.01** | **2.17** | **10-3** | **Area:year** | **Helotiales** | **Fungi** |
| **1** | **1.40** | **0.01** | **2.98** | **10-3** | **Area** | **Hymenochaetales** | **Fungi** |
| **1** | **1.46** | **0.01** | **3.11** | **2 x 10-3** | **year** | **Hymenochaetales** | **Fungi** |
| 1 | 0.66 | 0.00 | 1.41 | 0.10 | Area:year | Hymenochaetales | Fungi |
| **1** | **2.02** | **0.01** | **4.22** | **10-3** | **year** | **Hypocreales** | **Fungi** |
| **1** | **0.91** | **0.01** | **1.90** | **3 x 10-3** | **Area:year** | **Hypocreales** | **Fungi** |
| **1** | **0.80** | **0.01** | **1.67** | **0.01** | **Area** | **Hypocreales** | **Fungi** |
| **1** | **3.56** | **0.19** | **13.45** | **10-3** | **year** | **Mortierellales** | **Fungi** |
| **1** | **0.52** | **0.03** | **1.98** | **10-3** | **Area:year** | **Mortierellales** | **Fungi** |
| **1** | **0.83** | **0.04** | **3.13** | **0.02** | **Area** | **Mortierellales** | **Fungi** |
| **1** | **1.30** | **0.16** | **3.70** | **10-3** | **year** | **Mucorales** | **Fungi** |
| **1** | **0.76** | **0.09** | **2.15** | **2 x 10-3** | **Area:year** | **Mucorales** | **Fungi** |
| **1** | **0.81** | **0.10** | **2.30** | **0.01** | **Area** | **Mucorales** | **Fungi** |
| **1** | **1.28** | **0.09** | **4.09** | **10-3** | **year** | **Orbiliales** | **Fungi** |
| **1** | **0.67** | **0.05** | **2.13** | **10-3** | **Area:year** | **Orbiliales** | **Fungi** |
| **1** | **1.21** | **0.09** | **3.86** | **0.01** | **Area** | **Orbiliales** | **Fungi** |
| 1 | 0.13 | 0.09 | 0.49 | 1.00 | Area | Ostropales | Fungi |
| **1** | **1.57** | **0.00** | **3.24** | **10-3** | **Area** | **Pezizales** | **Fungi** |
| **1** | **2.05** | **0.01** | **4.23** | **10-3** | **year** | **Pezizales** | **Fungi** |
| 1 | 0.47 | 0.00 | 0.98 | 0.51 | Area:year | Pezizales | Fungi |
| **1** | **1.85** | **0.07** | **4.59** | **10-3** | **Area** | **Pleosporales** | **Fungi** |
| **1** | **1.81** | **0.06** | **4.48** | **10-3** | **year** | **Pleosporales** | **Fungi** |
| **1** | **0.94** | **0.03** | **2.34** | **3 x 10-3** | **Area:year** | **Pleosporales** | **Fungi** |
| **1** | **1.45** | **3.75 x 10-3** | **2.97** | **10-3** | **Area** | **Polyporales** | **Fungi** |
| **1** | **0.99** | **2.57 x 10-3** | **2.03** | **2 x 10-3** | **year** | **Polyporales** | **Fungi** |
| 1 | 0.60 | 1.56 x 10-3 | 1.24 | 0.08 | Area:year | Polyporales | Fungi |
| **1** | **0.95** | **0.03** | **2.04** | **3 x 10-3** | **Area** | **Pucciniales** | **Fungi** |
| **1** | **0.65** | **0.02** | **1.40** | **0.03** | **Area:year** | **Pucciniales** | **Fungi** |
| **1** | **0.75** | **0.02** | **1.61** | **0.04** | **year** | **Pucciniales** | **Fungi** |
| 1 | 0.64 | 0.03 | 1.50 | 0.11 | Area | Rhytismatales | Fungi |
| 1 | 0.61 | 0.02 | 1.42 | 0.17 | year | Rhytismatales | Fungi |
| **1** | **1.87** | **4.75 x 10-3** | **3.83** | **10-3** | **Area** | **Russulales** | **Fungi** |
| **1** | **1.33** | **3.38 X 10-3** | **2.73** | **10-3** | **year** | **Russulales** | **Fungi** |
| 1 | 0.44 | 1.11 X 10-3 | 0.90 | 0.72 | Area:year | Russulales | Fungi |
| **1** | **1.82** | **0.15** | **5.55** | **10-3** | **year** | **Saccharomycetales** | **Fungi** |
| **1** | **0.73** | **0.06** | **2.22** | **0.01** | **Area** | **Saccharomycetales** | **Fungi** |
| **1** | **0.54** | **0.09** | **1.30** | **0.03** | **Area:year** | **Sporidiobolales** | **Fungi** |
| 1 | 0.74 | 0.12 | 1.78 | 0.08 | year | Sporidiobolales | Fungi |
| 1 | 0.34 | 0.05 | 0.81 | 0.65 | Area | Sporidiobolales | Fungi |
| **1** | **1.68** | **0.03** | **3.85** | **10-3** | **Area** | **Thelephorales** | **Fungi** |
| **1** | **1.31** | **0.03** | **3.00** | **10-3** | **year** | **Thelephorales** | **Fungi** |
| 1 | 0.52 | 0.01 | 1.19 | 0.26 | Area:year | Thelephorales | Fungi |
| 1 | 1.00 | 1.00 | Inf | 0.33 | Area | Tritirachiales | Fungi |
| **1** | **1.15** | **0.05** | **2.67** | **0.01** | **year** | **Xylariales** | **Fungi** |
| **1** | **0.79** | **0.03** | **1.83** | **0.02** | **Area** | **Xylariales** | **Fungi** |
| 1 | 0.66 | 0.03 | 1.52 | 0.08 | Area:year | Xylariales | Fungi |
| **1** | **2.52** | **0.09** | **7.57** | **10-3** | **Area** | **Amphipoda** | **Invertebrates** |
| **1** | **4.10** | **0.15** | **12.34** | **10-3** | **year** | **Amphipoda** | **Invertebrates** |
| **1** | **1.15** | **0.04** | **3.47** | **10-3** | **Area:year** | **Amphipoda** | **Invertebrates** |
| **1** | **3.15** | **0.08** | **8.12** | **10-3** | **year** | **Anostraca** | **Invertebrates** |
| 1 | 0.78 | 0.02 | 2.02 | 0.06 | Area | Anostraca | Invertebrates |
| 1 | 0.69 | 0.02 | 1.77 | 0.08 | Area:year | Anostraca | Invertebrates |
| **1** | **4.93** | **0.02** | **10.42** | **10-3** | **Area** | **Araneae** | **Invertebrates** |
| **1** | **2.93** | **0.01** | **6.19** | **10-3** | **year** | **Araneae** | **Invertebrates** |
| **1** | **1.13** | **0.00** | **2.40** | **10-3** | **Area:year** | **Araneae** | **Invertebrates** |
| **1** | **0.99** | **0.02** | **2.40** | **0.03** | **year** | **Blattodea** | **Invertebrates** |
| 1 | 0.78 | 0.02 | 1.88 | 0.08 | Area | Blattodea | Invertebrates |
| 1 | 0.24 | 0.01 | 0.58 | 0.79 | Area:year | Blattodea | Invertebrates |
| **1** | **1.62** | **0.18** | **4.85** | **10-3** | **year** | **Calanoida** | **Invertebrates** |
| **1** | **0.93** | **0.10** | **2.78** | **0.01** | **Area:year** | **Calanoida** | **Invertebrates** |
| **1** | **0.79** | **0.09** | **2.35** | **0.01** | **Area** | **Calanoida** | **Invertebrates** |
| 1 | 0.61 | 0.17 | 1.70 | 0.20 | year | Cephalaspidea | Invertebrates |
| 1 | 0.05 | 0.01 | 0.13 | 0.71 | Area | Cephalaspidea | Invertebrates |
| **1** | **1.64** | **0.06** | **3.94** | **10-3** | **year** | **Cheilostomatida** | **Invertebrates** |
| **1** | **1.22** | **0.04** | **2.95** | **4 x 10-3** | **Area:year** | **Cheilostomatida** | **Invertebrates** |
| 1 | 0.74 | 0.03 | 1.78 | 0.07 | Area | Cheilostomatida | Invertebrates |
| **1** | **2.20** | **0.12** | **7.92** | **10-3** | **Area** | **Chitonida** | **Invertebrates** |
| **1** | **2.43** | **0.14** | **8.75** | **10-3** | **year** | **Chitonida** | **Invertebrates** |
| **1** | **1.71** | **0.10** | **6.19** | **10-3** | **Area:year** | **Chitonida** | **Invertebrates** |
| **1** | **3.80** | **4.06 X 10-3** | **7.80** | **10-3** | **Area** | **Coleoptera** | **Invertebrates** |
| **1** | **5.12** | **0.01** | **10.52** | **10-3** | **year** | **Coleoptera** | **Invertebrates** |
| **1** | **1.18** | **0.00** | **2.42** | **10-3** | **Area:year** | **Coleoptera** | **Invertebrates** |
| **1** | **1.34** | **0.13** | **4.11** | **3 x10-3** | **year** | **Crassiclitellata** | **Invertebrates** |
| **1** | **0.83** | **0.08** | **2.55** | **0.01** | **Area** | **Crassiclitellata** | **Invertebrates** |
| **1** | **0.61** | **0.06** | **1.87** | **0.04** | **Area:year** | **Crassiclitellata** | **Invertebrates** |
| **1** | **4.16** | **0.13** | **11.31** | **10-3** | **Area** | **Decapoda** | **Invertebrates** |
| **1** | **1.34** | **0.04** | **3.64** | **2 x 10-3** | **year** | **Decapoda** | **Invertebrates** |
| **1** | **1.04** | **0.03** | **2.82** | **0.01** | **Area:year** | **Decapoda** | **Invertebrates** |
| **1** | **0.58** | **0.19** | **13.04** | **0.01** | **Area:year** | **Dermaptera** | **Invertebrates** |
| 1 | 0.10 | 0.03 | 2.24 | 0.11 | year | Dermaptera | Invertebrates |
| 1 | 0.06 | 0.02 | 1.37 | 0.20 | Area | Dermaptera | Invertebrates |
| **1** | **1.37** | **0.15** | **4.04** | **10-3** | **year** | **Diplostraca** | **Invertebrates** |
| **1** | **0.96** | **0.11** | **2.82** | **0.01** | **Area** | **Diplostraca** | **Invertebrates** |
| **1** | **0.82** | **0.09** | **2.40** | **0.01** | **Area:year** | **Diplostraca** | **Invertebrates** |
| **1** | **9.77** | **0.01** | **20.85** | **10-3** | **Area** | **Diptera** | **Invertebrates** |
| **1** | **14.21** | **0.01** | **30.31** | **10-3** | **year** | **Diptera** | **Invertebrates** |
| **1** | **1.38** | **1.36 X 10-3** | **2.95** | **10-3** | **Area:year** | **Diptera** | **Invertebrates** |
| 1 | 0.39 | 0.09 | 3.93 | 0.06 | Area | Embioptera | Invertebrates |
| 1 | 0.10 | 0.02 | 0.96 | 0.35 | year | Embioptera | Invertebrates |
| 1 | 0.07 | 0.02 | 0.73 | 0.41 | Area:year | Embioptera | Invertebrates |
| **1** | **30.66** | **0.26** | **149.09** | **10-3** | **Area** | **Entomobryomorpha** | **Invertebrates** |
| **1** | **6.98** | **0.06** | **33.91** | **10-3** | **year** | **Entomobryomorpha** | **Invertebrates** |
| **1** | **5.94** | **0.05** | **28.86** | **10-3** | **Area:year** | **Entomobryomorpha** | **Invertebrates** |
| **1** | **1.61** | **0.04** | **3.96** | **10-3** | **Area** | **Ephemeroptera** | **Invertebrates** |
| **1** | **2.12** | **0.06** | **5.22** | **10-3** | **year** | **Ephemeroptera** | **Invertebrates** |
| **1** | **0.98** | **0.03** | **2.40** | **10-3** | **Area:year** | **Ephemeroptera** | **Invertebrates** |
| **1** | **1.13** | **0.25** | **3.33** | **2 x 10-3** | **year** | **Eunicida** | **Invertebrates** |
| 1 | 0.66 | 0.15 | 1.97 | 0.05 | Area | Eunicida | Invertebrates |
| 1 | 0.27 | 0.06 | 0.81 | 0.64 | Area:year | Eunicida | Invertebrates |
| 1 | 0.00 | NA | NA | NA | Area | Gordioidea | Invertebrates |
| 1 | 0.00 | NA | NA | NA | year | Gordioidea | Invertebrates |
| 1 | 0.00 | NA | NA | NA | Area:year | Gordioidea | Invertebrates |
| **1** | **2.15** | **0.23** | **9.75** | **10-3** | **year** | **Harpacticoida** | **Invertebrates** |
| **1** | **0.78** | **0.08** | **3.51** | **0.01** | **Area:year** | **Harpacticoida** | **Invertebrates** |
| **1** | **0.73** | **0.08** | **3.31** | **0.01** | **Area** | **Harpacticoida** | **Invertebrates** |
| **1** | **7.40** | **0.01** | **15.84** | **10-3** | **Area** | **Hemiptera** | **Invertebrates** |
| **1** | **13.04** | **0.02** | **27.91** | **10-3** | **year** | **Hemiptera** | **Invertebrates** |
| **1** | **1.67** | **2.36 X 10-3** | **3.57** | **10-3** | **Area:year** | **Hemiptera** | **Invertebrates** |
| **1** | **11.65** | **0.01** | **24.37** | **10-3** | **Area** | **Hymenoptera** | **Invertebrates** |
| **1** | **7.84** | **0.01** | **16.40** | **10-3** | **year** | **Hymenoptera** | **Invertebrates** |
| **1** | **1.47** | **1.49 X 10-3** | **3.07** | **10-3** | **Area:year** | **Hymenoptera** | **Invertebrates** |
| **1** | **1.39** | **0.03** | **3.03** | **10-3** | **Area** | **Isopoda** | **Invertebrates** |
| **1** | **1.23** | **0.03** | **2.69** | **10-3** | **year** | **Isopoda** | **Invertebrates** |
| 1 | 0.55 | 0.01 | 1.19 | 0.21 | Area:year | Isopoda | Invertebrates |
| **1** | **0.02** | **0.02** | **4737379681340138** | **10-3** | **Area** | **Ixodida** | **Invertebrates** |
| **1** | **0.90** | **0.98** | **255818502792367584** | **10-3** | **year** | **Ixodida** | **Invertebrates** |
| 1 | 0.11 | 0.11 | 0.61 | 0.50 | year | Lepetellida | Invertebrates |
| 1 | 0.01 | 0.01 | 0.04 | 0.98 | Area | Lepetellida | Invertebrates |
| **1** | **5.00** | **3.06 X 10-3** | **10.14** | **10-3** | **Area** | **Lepidoptera** | **Invertebrates** |
| **1** | **8.58** | **0.01** | **17.40** | **10-3** | **year** | **Lepidoptera** | **Invertebrates** |
| **1** | **2.44** | **0.00** | **4.95** | **10-3** | **Area:year** | **Lepidoptera** | **Invertebrates** |
| **1** | **2.35** | **0.07** | **5.83** | **10-3** | **Area** | **Littorinimorpha** | **Invertebrates** |
| **1** | **2.65** | **0.08** | **6.55** | **10-3** | **year** | **Littorinimorpha** | **Invertebrates** |
| 1 | 0.57 | 0.02 | 1.41 | 0.09 | Area:year | Littorinimorpha | Invertebrates |
| 1 | 0.37 | 0.15 | 1.69 | 0.25 | Area:year | Mantodea | Invertebrates |
| 1 | 0.22 | 0.09 | 1.00 | 0.46 | Area | Mantodea | Invertebrates |
| 1 | 0.08 | 0.03 | 0.37 | 0.61 | year | Mantodea | Invertebrates |
| **1** | **4.93** | **0.18** | **22.39** | **10-3** | **Area** | **Mesostigmata** | **Invertebrates** |
| **1** | **2.12** | **0.08** | **9.64** | **10-3** | **year** | **Mesostigmata** | **Invertebrates** |
| **1** | **1.21** | **0.04** | **5.49** | **10-3** | **Area:year** | **Mesostigmata** | **Invertebrates** |
| **1** | **3.86** | **0.44** | **20.86** | **10-3** | **year** | **Mytilida** | **Invertebrates** |
| **1** | **0.64** | **0.07** | **3.46** | **2 x 10-3** | **Area** | **Mytilida** | **Invertebrates** |
| **1** | **0.49** | **0.05** | **2.62** | **2 x 10-3** | **Area:year** | **Mytilida** | **Invertebrates** |
| **1** | **3.40** | **0.14** | **10.31** | **10-3** | **Area** | **Neogastropoda** | **Invertebrates** |
| **1** | **1.86** | **0.08** | **5.64** | **10-3** | **year** | **Neogastropoda** | **Invertebrates** |
| **1** | **1.83** | **0.07** | **5.55** | **10-3** | **Area:year** | **Neogastropoda** | **Invertebrates** |
| **1** | **2.57** | **0.01** | **6.09** | **10-3** | **Area** | **Neuroptera** | **Invertebrates** |
| **1** | **4.61** | **0.02** | **10.94** | **10-3** | **year** | **Neuroptera** | **Invertebrates** |
| **1** | **1.08** | **4.74 X 10-3** | **2.57** | **0.01** | **Area:year** | **Neuroptera** | **Invertebrates** |
| **1** | **1.40** | **0.07** | **3.21** | **10-3** | **Area** | **Nudibranchia** | **Invertebrates** |
| **1** | **1.00** | **0.05** | **2.30** | **2 x 10-3** | **year** | **Nudibranchia** | **Invertebrates** |
| 1 | 0.55 | 0.03 | 1.27 | 0.15 | Area:year | Nudibranchia | Invertebrates |
| 1 | 0.56 | 0.02 | 1.25 | 0.23 | year | Odonata | Invertebrates |
| 1 | 0.43 | 0.02 | 0.96 | 0.48 | Area | Odonata | Invertebrates |
| 1 | 0.43 | 0.02 | 0.95 | 0.53 | Area:year | Odonata | Invertebrates |
| **1** | **1.81** | **0.02** | **4.09** | **10-3** | **Area** | **Orthoptera** | **Invertebrates** |
| **1** | **1.95** | **0.02** | **4.40** | **10-3** | **year** | **Orthoptera** | **Invertebrates** |
| 1 | 0.42 | 3.77 X 10-3 | 0.94 | 0.50 | Area:year | Orthoptera | Invertebrates |
| **1** | **1.52** | **0.26** | **11.86** | **0.01** | **year** | **Pedunculata** | **Invertebrates** |
| **1** | **1.35** | **0.23** | **10.52** | **0.01** | **Area** | **Pedunculata** | **Invertebrates** |
| 1 | 0.07 | 0.01 | 0.51 | 0.47 | Area:year | Pedunculata | Invertebrates |
| **1** | **2.96** | **0.17** | **11.36** | **10-3** | **Area** | **Phyllodocida** | **Invertebrates** |
| **1** | **1.64** | **0.09** | **6.29** | **10-3** | **year** | **Phyllodocida** | **Invertebrates** |
| **1** | **1.69** | **0.10** | **6.49** | **10-3** | **Area:year** | **Phyllodocida** | **Invertebrates** |
| **1** | **2.50** | **0.04** | **5.32** | **10-3** | **year** | **Plecoptera** | **Invertebrates** |
| 1 | 0.43 | 0.01 | 0.93 | 0.69 | Area | Plecoptera | Invertebrates |
| 1 | 0.45 | 0.01 | 0.97 | 0.93 | Area:year | Plecoptera | Invertebrates |
| **1** | **1.03** | **0.13** | **3.21** | **2 x 10-3** | **year** | **Podocopida** | **Invertebrates** |
| **1** | **0.92** | **0.12** | **2.87** | **4 x 10-3** | **Area:year** | **Podocopida** | **Invertebrates** |
| **1** | **0.91** | **0.12** | **2.85** | **0.01** | **Area** | **Podocopida** | **Invertebrates** |
| **1** | **22.39** | **0.12** | **67.31** | **10-3** | **Area** | **Psocodea** | **Invertebrates** |
| **1** | **3.23** | **0.02** | **9.71** | **10-3** | **year** | **Psocodea** | **Invertebrates** |
| **1** | **4.73** | **0.03** | **14.21** | **10-3** | **Area:year** | **Psocodea** | **Invertebrates** |
| **1** | **3.17** | **0.25** | **12.81** | **10-3** | **Area** | **Sabellida** | **Invertebrates** |
| **1** | **1.38** | **0.11** | **5.58** | **10-3** | **year** | **Sabellida** | **Invertebrates** |
| **1** | **1.39** | **0.11** | **5.59** | **10-3** | **Area:year** | **Sabellida** | **Invertebrates** |
| **1** | **1.91** | **0.08** | **6.40** | **10-3** | **Area** | **Sessilia** | **Invertebrates** |
| **1** | **4.15** | **0.17** | **13.86** | **10-3** | **year** | **Sessilia** | **Invertebrates** |
| **1** | **0.69** | **0.03** | **2.31** | **0.02** | **Area:year** | **Sessilia** | **Invertebrates** |
| 1 | 0.50 | 0.04 | 1.00 | 1.00 | Area | Solifugae | Invertebrates |
| 1 | 0.50 | 0.04 | 1.00 | 1.00 | year | Solifugae | Invertebrates |
| 1 | 0.50 | 0.04 | 1.00 | 1.00 | Area:year | Solifugae | Invertebrates |
| **1** | **1.09** | **0.08** | **2.63** | **2 x 10-3** | **Area** | **Stylommatophora** | **Invertebrates** |
| **1** | **0.84** | **0.06** | **2.02** | **2 x 10-3** | **year** | **Stylommatophora** | **Invertebrates** |
| **1** | **0.96** | **0.07** | **2.31** | **3 x 10-3** | **Area:year** | **Stylommatophora** | **Invertebrates** |
| 1 | 0.42 | 0.45 | 43456905729895712 | 0.08 | Area | Symphypleona | Invertebrates |
| 1 | 0.12 | 0.13 | 12416258779970158 | 0.08 | year | Symphypleona | Invertebrates |
| 1 | 0.38 | 0.42 | 39732028095904608 | 0.08 | Area:year | Symphypleona | Invertebrates |
| **1** | **2.89** | **0.02** | **8.49** | **10-3** | **year** | **Thysanoptera** | **Invertebrates** |
| **1** | **1.02** | **0.01** | **2.99** | **0.01** | **Area:year** | **Thysanoptera** | **Invertebrates** |
| **1** | **0.82** | **4.86 X 10-3** | **2.40** | **0.04** | **Area** | **Thysanoptera** | **Invertebrates** |
| **1** | **1.71** | **0.01** | **3.57** | **10-3** | **year** | **Trichoptera** | **Invertebrates** |
| **1** | **0.76** | **4.66 X 10-3** | **1.58** | **0.01** | **Area:year** | **Trichoptera** | **Invertebrates** |
| 1 | 0.62 | 3.80 X 10-3 | 1.29 | 0.09 | Area | Trichoptera | Invertebrates |
| **1** | **4.09** | **0.42** | **30.63** | **10-3** | **Area** | **Trochida** | **Invertebrates** |
| **1** | **1.03** | **0.11** | **7.73** | **10-3** | **year** | **Trochida** | **Invertebrates** |
| **1** | **0.53** | **0.05** | **3.99** | **0.01** | **Area:year** | **Trochida** | **Invertebrates** |
| **1** | **3.75** | **0.16** | **17.54** | **10-3** | **Area** | **Trombidiformes** | **Invertebrates** |
| 1 | 0.43 | 0.02 | 2.00 | 0.13 | year | Trombidiformes | Invertebrates |
| 1 | 0.35 | 0.01 | 1.65 | 0.19 | Area:year | Trombidiformes | Invertebrates |
| 1 | 0.67 | 0.50 | 2.67 | 0.40 | Area | Zygentoma | Invertebrates |
| 1 | 0.12 | 0.09 | 0.46 | 0.73 | year | Zygentoma | Invertebrates |
| 1 | 0.05 | 0.04 | 0.21 | 0.73 | Area:year | Zygentoma | Invertebrates |
